# Supplementary material
Source: PubMed Central journal article supplement (PMC5322472)
Supplement: NIHMS831612-supplement-2.pdf [file NIHMS831612-supplement-2.pdf]

# Supplementary Tables

**Supplementary table 1.** The top ten most observed variants of each gRNA and their fraction in each samples time point. The first sequence, in bold, represents the original sequence of each gRNA, dashes represent deleted bases, capital letters represent insertions, underlined letters represent mismatches.

| hgRNA      | Sequence                                                            | % at 0d | % after 1d | % after 3d | % after 5d |
|------------|---------------------------------------------------------------------|---------|------------|------------|------------|
| <b>A21</b> | <b>acc ggtcccctccaccccacagtg gggttagagctagaaatagcaagttaacctaa</b>   | 61.66   | 54.24      | 8.75       | 1.82       |
| variant 1  | acc ggtcccctccaccccacaAgtg gggttagagctagaaatagcaagttaacctaa         | 1.74    | 4.55       | 15.80      | 10.59      |
| variant 2  | acc ggtcccctccaccccacaAAgtg gggttagagctagaaatagcaagttaacctaa        | 0.00    | 0.06       | 4.57       | 8.54       |
| variant 3  | acc ggt----- gggttagagctagaaatagcaagttaacctaa                       | 0.18    | 0.29       | 4.28       | 4.25       |
| variant 4  | acc ----- gggttagagctagaaatagcaagttaacctaa                          | 0.04    | 0.25       | 1.26       | 6.02       |
| variant 5  | acc ggtcccctccacccc----- -----tagaaatagcaagttaacctaa                | 0.08    | 0.10       | 1.11       | 1.30       |
| variant 6  | acc ----- -ggttagagctagaaatagcaagttaacctaa                          | 0.04    | 0.08       | 1.14       | 1.18       |
| variant 7  | acc ggtcccctccacccc----- -----ctagaaatagcaagttaacctaa               | 0.04    | 0.16       | 0.69       | 0.95       |
| variant 8  | acc ggt----- -----ctagaaatagcaagttaacctaa                           | 0.01    | 0.14       | 0.60       | 0.88       |
| variant 9  | acc gg----- ----tagagctagaaatagcaagttaacctaa                        | 0.02    | 0.05       | 0.51       | 0.37       |
| <b>B21</b> | <b>acc ggtcggagggaggtgggttag gggttagagctagaaatagcaagttaacctaa</b>   | 74.17   | 73.91      | 71.25      | 64.62      |
| variant 1  | acc ggtcggagggaggt----- gggttagagctagaaatagcaagttaacctaa            | 0.00    | 0.24       | 1.18       | 3.55       |
| variant 2  | acc ggtcggagggaggtgggtTtag gggttagagctagaaatagcaagttaacctaa         | 0.00    | 0.06       | 0.61       | 1.29       |
| variant 3  | acc ggtcggagggaggggggttag gggttagagctagaaatagcaagttaacctaa          | 0.58    | 0.61       | 0.57       | 0.49       |
| variant 4  | acc ggtcggagggaggtgggttag gggttagagctagaaatagc <u>g</u> agttaacctaa | 0.48    | 0.53       | 0.51       | 0.44       |
| variant 5  | acc ggtcggagggaggtgggttag gggttagagctagagatagcaagttaacctaa          | 0.51    | 0.49       | 0.47       | 0.46       |
| variant 6  | acc ggtcggagggaggtgggttag gggttagagctagaa <u>g</u> tagcaagttaacctaa | 0.50    | 0.52       | 0.44       | 0.46       |
| variant 7  | acc ggtcggaggggggtgggttag gggttagagctagaaatagcaagttaacctaa          | 0.51    | 0.50       | 0.47       | 0.44       |
| variant 8  | <u>g</u> cc ggtcggagggaggtgggttag gggttagagctagaaatagcaagttaacctaa  | 0.50    | 0.49       | 0.45       | 0.43       |
| variant 9  | acc ggtcgggggaggtgggttag gggttagagctagaaatagcaagttaacctaa           | 0.48    | 0.44       | 0.50       | 0.40       |
| <b>C21</b> | <b>acc ggtacaccctcaagcagtg gggttagagctagaaatagcaagttaacctaa</b>     | 62.74   | 47.14      | 6.53       | 1.64       |
| variant 1  | acc ggtacaccctcaagcagTtg gggttagagctagaaatagcaagttaacctaa           | 0.98    | 11.51      | 28.63      | 21.92      |
| variant 2  | acc ggtacaccctcaagcagTTtg gggttagagctagaaatagcaagttaacctaa          | 0.01    | 0.12       | 3.75       | 7.29       |
| variant 3  | acc ggtacaccctcaa-----gtg gggttagagctagaaatagcaagttaacctaa          | 0.01    | 0.26       | 1.37       | 1.57       |
| variant 4  | acc ggtacaccctca----- -----agctagaaatagcaagttaacctaa                | 0.02    | 0.13       | 1.20       | 1.92       |
| variant 5  | acc g-----gtg gggttagagctagaaatagcaagttaacctaa                      | 0.02    | 0.18       | 1.14       | 1.32       |
| variant 6  | acc ggtacaccctcaagca----g ---ttagagctagaaatagcaagttaacctaa          | 0.02    | 0.13       | 0.92       | 1.64       |
| variant 7  | acc ggtacaccctcaagcaAgtg gggttagagctagaaatagcaagttaacctaa           | 0.01    | 0.21       | 0.93       | 0.82       |
| variant 8  | acc ggtacaccctcaagc----- -----agctagaaatagcaagttaacctaa             | 0.02    | 0.13       | 0.61       | 0.94       |
| variant 9  | acc ggtacaccctcaagca----- -ggttagagctagaaatagcaagttaacctaa          | 0.03    | 0.14       | 0.62       | 0.71       |
| <b>D21</b> | <b>acc ggtcacgctacggccaagtg gggttagagctagaaatagcaagttaacctaa</b>    | 64.00   | 55.82      | 23.87      | 14.80      |
| variant 1  | acc ggtcacgctacggccaagGtg gggttagagctagaaatagcaagttaacctaa          | 0.09    | 1.19       | 5.43       | 8.40       |
| variant 2  | acc ggtcacgctacg----- gggttagagctagaaatagcaagttaacctaa              | 0.02    | 0.38       | 3.97       | 2.42       |
| variant 3  | acc ggtcacgctacg-----gtg gggttagagctagaaatagcaagttaacctaa           | 0.07    | 0.40       | 2.14       | 1.56       |
| variant 4  | acc g-----gtg gggttagagctagaaatagcaagttaacctaa                      | 0.03    | 0.34       | 1.66       | 2.38       |
| variant 5  | acc ggtcac-----gtg gggttagagctagaaatagcaagttaacctaa                 | 0.07    | 0.38       | 1.62       | 1.97       |
| variant 6  | acc ggtcac----- -----gctagaaatagcaagttaacctaa                       | 0.05    | 0.32       | 1.07       | 1.85       |
| variant 7  | acc ggtcacgctac----- -ggttagagctagaaatagcaagttaacctaa               | 0.04    | 0.23       | 1.12       | 1.76       |
| variant 8  | acc ggtcacgctacggccaag-gtg gggttagagctagaaatagcaagttaacctaa         | 0.05    | 0.52       | 1.11       | 1.02       |
| variant 9  | acc ggtcacgctac----- gggttagagctagaaatagcaagttaacctaa               | 0.02    | 0.11       | 1.00       | 1.05       |

Supplementary table 1 (cont'd).

| hgRNA            | Sequence                                                          | % at 0d | % after 1d | % after 3d | % after 5d |
|------------------|-------------------------------------------------------------------|---------|------------|------------|------------|
| <b>E21</b>       | <b>acc ggttccagagatactgacgtg gggttagagctagaaatagcaagttaacctaa</b> | 64.30   | 54.57      | 24.17      | 9.45       |
| <i>variant 1</i> | acc ggttccagagatactgacCgtg gggttagagctagaaatagcaagttaacctaa       | 0.23    | 2.06       | 8.23       | 9.88       |
| <i>variant 2</i> | acc ggttccagagatac-----tg gggttagagctagaaatagcaagttaacctaa        | 0.16    | 0.49       | 4.35       | 6.06       |
| <i>variant 3</i> | acc ggttcc----- -----agagctagaaatagcaagttaacctaa                  | 0.16    | 0.53       | 3.20       | 4.90       |
| <i>variant 4</i> | acc g-----gtg gggttagagctagaaatagcaagttaacctaa                    | 0.06    | 0.18       | 1.28       | 2.65       |
| <i>variant 5</i> | acc ggttcca-----gtg gggttagagctagaaatagcaagttaacctaa              | 0.07    | 0.17       | 1.20       | 1.62       |
| <i>variant 6</i> | acc ----- -ggttagagctagaaatagcaagttaacctaa                        | 0.04    | 0.09       | 0.97       | 1.60       |
| <i>variant 7</i> | acc ggttccagagatactgacCCgtg gggttagagctagaaatagcaagttaacctaa      | 0.00    | 0.03       | 0.81       | 1.86       |
| <i>variant 8</i> | acc ggttccagagatact----- -----gagctagaaatagcaagttaacctaa          | 0.04    | 0.10       | 0.76       | 1.06       |
| <i>variant 9</i> | acc ggttccagagata----- -----ctagaaatagcaagttaacctaa               | 0.04    | 0.06       | 0.57       | 0.88       |
| <b>F21</b>       | <b>acc ggtgtgtagcgatggctacag gggttagagctagaaatagcaagttaacctaa</b> | 66.81   | 61.32      | 30.21      | 13.94      |
| <i>variant 1</i> | acc ggtgtgtagcgatggctaAcag gggttagagctagaaatagcaagttaacctaa       | 0.02    | 0.82       | 3.30       | 1.77       |
| <i>variant 2</i> | acc ggtgtgtagcgatggctaCAcag gggttagagctagaaatagcaagttaacctaa      | 0.02    | 0.28       | 1.77       | 2.23       |
| <i>variant 3</i> | acc ggtgtgtag-----gtg gggttagagctagaaatagcaagttaacctaa            | 0.01    | 0.10       | 1.32       | 2.72       |
| <i>variant 4</i> | acc ggtgtgtagcgatg----- -----gctagaaatagcaagttaacctaa             | 0.01    | 0.10       | 1.42       | 2.43       |
| <i>variant 5</i> | acc ggtg----- -----tgtagctagaaatagcaagttaacctaa                   | 0.01    | 0.11       | 1.11       | 2.73       |
| <i>variant 6</i> | acc ggtgtgtag-----cag gggttagagctagaaatagcaagttaacctaa            | 0.00    | 0.14       | 1.05       | 1.57       |
| <i>variant 7</i> | acc ggtgtgtagcgatggc----- -----tagagctagaaatagcaagttaacctaa       | 0.00    | 0.12       | 1.17       | 1.32       |
| <i>variant 8</i> | acc ggtgtg----- -----tagagctagaaatagcaagttaacctaa                 | 0.01    | 0.09       | 0.87       | 1.72       |
| <i>variant 9</i> | acc ggtgtgtagcgatg----- gggttagagctagaaatagcaagttaacctaa          | 0.01    | 0.05       | 0.80       | 1.43       |
| <b>G21</b>       | <b>acc ggtatgCGgatgcaatctccg gggttagagctagaaatagcaagttaacctaa</b> | 64.07   | 48.13      | 16.44      | 4.98       |
| <i>variant 1</i> | acc ggtatgCGgatgcaatctTccg gggttagagctagaaatagcaagttaacctaa       | 0.43    | 4.40       | 10.03      | 11.26      |
| <i>variant 2</i> | acc ggtatg-----cg gggttagagctagaaatagcaagttaacctaa                | 0.04    | 0.54       | 2.64       | 4.36       |
| <i>variant 3</i> | acc g----- gggttagagctagaaatagcaagttaacctaa                       | 0.07    | 0.73       | 2.40       | 3.36       |
| <i>variant 4</i> | acc ggtatgCGgatgcaatc--cg gggttagagctagaaatagcaagttaacctaa        | 0.28    | 1.46       | 1.64       | 0.83       |
| <i>variant 5</i> | acc ggtatgCGgat----- -----gctagaaatagcaagttaacctaa                | 0.07    | 0.24       | 1.53       | 1.56       |
| <i>variant 6</i> | acc ggtatgCGgatgca--TAccg gggttagagctagaaatagcaagttaacctaa        | 0.06    | 0.34       | 1.44       | 1.28       |
| <i>variant 7</i> | acc ggtatgCGgatgcaatctTTccg gggttagagctagaaatagcaagttaacctaa      | 0.00    | 0.04       | 0.58       | 1.65       |
| <i>variant 8</i> | acc ggtatgCGgatgcaat-tccg gggttagagctagaaatagcaagttaacctaa        | 0.00    | 0.19       | 0.82       | 0.56       |
| <i>variant 9</i> | acc ggtatgCGgatg-----cg gggttagagctagaaatagcaagttaacctaa          | 0.03    | 0.11       | 0.46       | 0.92       |

**Supplementary table 2.** Binary distance matrix between hgRNA variants in different subpopulations.

| hgRNA<br>A21 | 0     | 0,1   | 0,2   | 0,3   | 0,3,1 | 0,3,2 | 0,3,2,1 | 0,3,2,2 | 0,3,2,3 | 0,3,3 | 0,4   | 0,4,1 | 0,4,1,1 | 0,4,1,2 | 0,4,1,3 | 0,4,3 | 0,4,3 | 0,5   | 0,6   |
|--------------|-------|-------|-------|-------|-------|-------|---------|---------|---------|-------|-------|-------|---------|---------|---------|-------|-------|-------|-------|
| 0            | 0     | 0.6   | 0.624 | 0.592 | 0.565 | 0.571 | 0.657   | 0.648   | 0.605   | 0.568 | 0.618 | 0.628 | 0.685   | 0.688   | 0.715   | 0.612 | 0.61  | 0.608 | 0.617 |
| 0,1          | 0.6   | 0     | 0.488 | 0.434 | 0.487 | 0.498 | 0.606   | 0.584   | 0.549   | 0.501 | 0.489 | 0.587 | 0.714   | 0.656   | 0.686   | 0.589 | 0.585 | 0.434 | 0.468 |
| 0,2          | 0.624 | 0.488 | 0     | 0.46  | 0.562 | 0.57  | 0.656   | 0.642   | 0.619   | 0.578 | 0.485 | 0.613 | 0.708   | 0.675   | 0.699   | 0.608 | 0.592 | 0.474 | 0.488 |
| 0,3          | 0.592 | 0.434 | 0.46  | 0     | 0.353 | 0.357 | 0.473   | 0.461   | 0.433   | 0.362 | 0.492 | 0.591 | 0.693   | 0.655   | 0.682   | 0.595 | 0.588 | 0.423 | 0.419 |
| 0,3,1        | 0.565 | 0.487 | 0.562 | 0.353 | 0     | 0.332 | 0.442   | 0.445   | 0.393   | 0.345 | 0.538 | 0.59  | 0.697   | 0.64    | 0.683   | 0.59  | 0.584 | 0.49  | 0.477 |
| 0,3,2        | 0.571 | 0.498 | 0.57  | 0.357 | 0.332 | 0     | 0.383   | 0.364   | 0.345   | 0.346 | 0.558 | 0.6   | 0.689   | 0.65    | 0.684   | 0.614 | 0.594 | 0.524 | 0.491 |
| 0,3,2,1      | 0.657 | 0.606 | 0.656 | 0.473 | 0.442 | 0.383 | 0       | 0.325   | 0.379   | 0.459 | 0.665 | 0.669 | 0.693   | 0.662   | 0.712   | 0.669 | 0.651 | 0.623 | 0.578 |
| 0,3,2,2      | 0.648 | 0.584 | 0.642 | 0.461 | 0.445 | 0.364 | 0.325   | 0       | 0.373   | 0.412 | 0.653 | 0.659 | 0.671   | 0.642   | 0.684   | 0.644 | 0.632 | 0.628 | 0.575 |
| 0,3,2,3      | 0.605 | 0.549 | 0.619 | 0.433 | 0.393 | 0.345 | 0.379   | 0.373   | 0       | 0.39  | 0.604 | 0.628 | 0.651   | 0.634   | 0.676   | 0.617 | 0.606 | 0.585 | 0.537 |
| 0,3,3        | 0.568 | 0.501 | 0.578 | 0.362 | 0.345 | 0.346 | 0.459   | 0.412   | 0.39    | 0     | 0.55  | 0.603 | 0.693   | 0.633   | 0.675   | 0.594 | 0.581 | 0.52  | 0.502 |
| 0,4          | 0.618 | 0.489 | 0.485 | 0.492 | 0.538 | 0.558 | 0.665   | 0.653   | 0.604   | 0.55  | 0     | 0.483 | 0.68    | 0.613   | 0.653   | 0.506 | 0.466 | 0.416 | 0.515 |
| 0,4,1        | 0.628 | 0.587 | 0.613 | 0.591 | 0.59  | 0.6   | 0.669   | 0.659   | 0.628   | 0.603 | 0.483 | 0     | 0.546   | 0.456   | 0.512   | 0.457 | 0.442 | 0.555 | 0.613 |
| 0,4,1,1      | 0.685 | 0.714 | 0.708 | 0.693 | 0.697 | 0.689 | 0.693   | 0.671   | 0.651   | 0.693 | 0.68  | 0.546 | 0       | 0.497   | 0.453   | 0.561 | 0.573 | 0.732 | 0.72  |
| 0,4,1,2      | 0.688 | 0.656 | 0.675 | 0.655 | 0.64  | 0.65  | 0.662   | 0.642   | 0.634   | 0.633 | 0.613 | 0.456 | 0.497   | 0       | 0.472   | 0.505 | 0.499 | 0.662 | 0.68  |
| 0,4,1,3      | 0.715 | 0.686 | 0.699 | 0.682 | 0.683 | 0.684 | 0.712   | 0.684   | 0.676   | 0.675 | 0.653 | 0.512 | 0.453   | 0.472   | 0       | 0.546 | 0.543 | 0.702 | 0.7   |
| 0,4,3        | 0.612 | 0.589 | 0.608 | 0.595 | 0.59  | 0.614 | 0.669   | 0.644   | 0.617   | 0.594 | 0.506 | 0.457 | 0.561   | 0.505   | 0.546   | 0     | 0.416 | 0.602 | 0.613 |
| 0,4,3        | 0.61  | 0.585 | 0.592 | 0.588 | 0.584 | 0.594 | 0.651   | 0.632   | 0.606   | 0.581 | 0.466 | 0.442 | 0.573   | 0.499   | 0.543   | 0.416 | 0     | 0.576 | 0.591 |
| 0,5          | 0.608 | 0.434 | 0.474 | 0.423 | 0.49  | 0.524 | 0.623   | 0.628   | 0.585   | 0.52  | 0.416 | 0.555 | 0.732   | 0.662   | 0.702   | 0.602 | 0.576 | 0     | 0.458 |
| 0,6          | 0.617 | 0.468 | 0.488 | 0.419 | 0.477 | 0.491 | 0.578   | 0.575   | 0.537   | 0.502 | 0.515 | 0.613 | 0.72    | 0.68    | 0.7     | 0.613 | 0.591 | 0.458 | 0     |

| hgRNA<br>C21 | 0     | 0,1   | 0,1,1 | 0,1,1,1 | 0,1,1,2 | 0,1,1,3 | 0,1,2 | 0,1,2,1 | 0,1,2,2 | 0,1,2,3 | 0,1,3 | 0,2   | 0,2,1 | 0,2,2 | 0,2,3 | 0,3   | 0,4   | 0,5   | 0,6   |
|--------------|-------|-------|-------|---------|---------|---------|-------|---------|---------|---------|-------|-------|-------|-------|-------|-------|-------|-------|-------|
| 0            | 0     | 0.572 | 0.503 | 0.535   | 0.6     | 0.553   | 0.509 | 0.472   | 0.506   | 0.46    | 0.508 | 0.557 | 0.551 | 0.555 | 0.546 | 0.509 | 0.554 | 0.552 | 0.563 |
| 0,1          | 0.572 | 0     | 0.311 | 0.503   | 0.622   | 0.557   | 0.282 | 0.451   | 0.396   | 0.415   | 0.319 | 0.434 | 0.484 | 0.482 | 0.492 | 0.314 | 0.317 | 0.287 | 0.323 |
| 0,1,1        | 0.503 | 0.311 | 0     | 0.438   | 0.581   | 0.477   | 0.328 | 0.395   | 0.36    | 0.385   | 0.36  | 0.449 | 0.493 | 0.494 | 0.5   | 0.335 | 0.371 | 0.336 | 0.365 |
| 0,1,1,1      | 0.535 | 0.503 | 0.438 | 0       | 0.418   | 0.385   | 0.472 | 0.499   | 0.477   | 0.485   | 0.504 | 0.561 | 0.569 | 0.577 | 0.589 | 0.492 | 0.531 | 0.509 | 0.527 |
| 0,1,1,2      | 0.6   | 0.622 | 0.581 | 0.418   | 0       | 0.428   | 0.605 | 0.609   | 0.601   | 0.581   | 0.608 | 0.647 | 0.651 | 0.659 | 0.656 | 0.613 | 0.645 | 0.633 | 0.639 |
| 0,1,1,3      | 0.553 | 0.557 | 0.477 | 0.385   | 0.428   | 0       | 0.543 | 0.514   | 0.52    | 0.525   | 0.536 | 0.594 | 0.615 | 0.616 | 0.615 | 0.55  | 0.576 | 0.57  | 0.579 |
| 0,1,2        | 0.509 | 0.282 | 0.328 | 0.472   | 0.605   | 0.543   | 0     | 0.388   | 0.358   | 0.343   | 0.311 | 0.411 | 0.462 | 0.463 | 0.467 | 0.294 | 0.366 | 0.333 | 0.333 |
| 0,1,2,1      | 0.472 | 0.451 | 0.395 | 0.499   | 0.609   | 0.514   | 0.388 | 0       | 0.405   | 0.392   | 0.425 | 0.493 | 0.513 | 0.516 | 0.517 | 0.415 | 0.464 | 0.458 | 0.469 |
| 0,1,2,2      | 0.506 | 0.396 | 0.36  | 0.477   | 0.601   | 0.52    | 0.358 | 0.405   | 0       | 0.382   | 0.402 | 0.493 | 0.522 | 0.522 | 0.532 | 0.387 | 0.454 | 0.403 | 0.436 |
| 0,1,2,3      | 0.46  | 0.415 | 0.385 | 0.485   | 0.581   | 0.525   | 0.343 | 0.392   | 0.382   | 0       | 0.405 | 0.475 | 0.516 | 0.519 | 0.517 | 0.387 | 0.463 | 0.438 | 0.456 |
| 0,1,3        | 0.508 | 0.319 | 0.36  | 0.504   | 0.608   | 0.536   | 0.311 | 0.425   | 0.402   | 0.405   | 0     | 0.426 | 0.461 | 0.471 | 0.466 | 0.336 | 0.384 | 0.348 | 0.377 |
| 0,2          | 0.557 | 0.434 | 0.449 | 0.561   | 0.647   | 0.594   | 0.411 | 0.493   | 0.493   | 0.475   | 0.426 | 0     | 0.289 | 0.274 | 0.259 | 0.399 | 0.417 | 0.416 | 0.42  |
| 0,2,1        | 0.551 | 0.484 | 0.493 | 0.569   | 0.651   | 0.615   | 0.462 | 0.513   | 0.522   | 0.516   | 0.461 | 0.289 | 0     | 0.312 | 0.267 | 0.456 | 0.47  | 0.464 | 0.486 |
| 0,2,2        | 0.555 | 0.482 | 0.494 | 0.577   | 0.659   | 0.616   | 0.463 | 0.516   | 0.522   | 0.519   | 0.471 | 0.274 | 0.312 | 0     | 0.265 | 0.44  | 0.474 | 0.465 | 0.487 |
| 0,2,3        | 0.546 | 0.492 | 0.5   | 0.589   | 0.656   | 0.615   | 0.467 | 0.517   | 0.532   | 0.517   | 0.466 | 0.259 | 0.267 | 0.265 | 0     | 0.458 | 0.483 | 0.48  | 0.491 |
| 0,3          | 0.509 | 0.314 | 0.335 | 0.492   | 0.613   | 0.55    | 0.294 | 0.415   | 0.387   | 0.387   | 0.336 | 0.399 | 0.456 | 0.44  | 0.458 | 0     | 0.35  | 0.303 | 0.329 |
| 0,4          | 0.554 | 0.317 | 0.371 | 0.531   | 0.645   | 0.576   | 0.366 | 0.464   | 0.454   | 0.463   | 0.384 | 0.417 | 0.47  | 0.474 | 0.483 | 0.35  | 0     | 0.328 | 0.348 |
| 0,5          | 0.552 | 0.287 | 0.336 | 0.509   | 0.633   | 0.57    | 0.333 | 0.458   | 0.403   | 0.438   | 0.348 | 0.416 | 0.464 | 0.465 | 0.48  | 0.303 | 0.328 | 0     | 0.292 |
| 0,6          | 0.563 | 0.323 | 0.365 | 0.527   | 0.639   | 0.579   | 0.333 | 0.469   | 0.436   | 0.456   | 0.377 | 0.42  | 0.486 | 0.487 | 0.491 | 0.329 | 0.348 | 0.292 | 0     |

# Supplementary Note

The sequences of various gRNA constructs used in this study.

## >hgRNA-A21

```
GAGGGCCTATTTCCCATGATTCCTTCATATTTGCATATACGATACAAGGCTGTTAGAGAGATAAATTGGA  
ATTAATTTGACTGTAAACACAAAGATATTAGTACAAAATACGTGACGTAGAAAGTAATAATTTCTTGGG  
TAGTTTGCAGTTTTAAAATTATGTTTTAAAATGGACTATCATATGCTTACCGTAACTTGAAAGTATTTT  
GATTTCTTGGCTTTATATATCTTGTGGAAAGGACG AACACC GTCCCCTCCACCCACAGTG GGGTTA  
GAGCTAGAAATAGCAAGTTAACCTAAGGCTAGTCCGTTATCAACTTGAAAAAGTGGCACCGAGTCGGTG  
CTTTTTTTT
```

U6 Promoter

Predicted TSS

Spacer

gRNA Scaffold

U6 Terminator

## >sgRNA-A21

```
GAGGGCCTATTTCCCATGATTCCTTCATATTTGCATATACGATACAAGGCTGTTAGAGAGATAAATTGGA  
ATTAATTTGACTGTAAACACAAAGATATTAGTACAAAATACGTGACGTAGAAAGTAATAATTTCTTGGG  
TAGTTTGCAGTTTTAAAATTATGTTTTAAAATGGACTATCATATGCTTACCGTAACTTGAAAGTATTTT  
GATTTCTTGGCTTTATATATCTTGTGGAAAGGACG AACACC GTCCCCTCCACCCACAGTG GTTTTA  
GAGCTAGAAATAGCAAGTTAAAATAAGGCTAGTCCGTTATCAACTTGAAAAAGTGGCACCGAGTCGGTG  
CTTTTTTTT
```

U6 Promoter

Predicted TSS

Spacer

gRNA Scaffold

U6 Terminator

## >A21-Target

```
AAGAGGATGGTGCAGCAACCAAG AACAA GAAAGTATTTTCGATTTCTTGGCTTTATATATCTTGTGGAAA  
GGACG AACACCG GTCCCCTCCACCCACAGTG GGGTTAGAGCTAGAAATAGCAAGTTAA GGTAAG GTG  
AGAGGCACCTGTCAGATTGA
```

Truncated Promoter

Spacer

Truncated Scaffold with PAM

Primer-binding Sites

## >hgRNA-B21

```
GAGGGCCTATTTCCCATGATTCCTTCATATTTGCATATACGATACAAGGCTGTTAGAGAGATAAATTGGA  
ATTAATTTGACTGTAAACACAAAGATATTAGTACAAAATACGTGACGTAGAAAGTAATAATTTCTTGGG  
TAGTTTGCAGTTTTAAAATTATGTTTTAAAATGGACTATCATATGCTTACCGTAACTTGAAAGTATTTT
```

GATTTCTTGGCTTTATATATCTTGTGGAAAGGACG AAACACC GTCGGAGGGAGGTGGGTTAG GGGTTA  
GAGCTAGAAATAGCAAGTTAACCTAAGGCTAGTCCGTTATCAACTTGAAAAAGTGGCACCGAGTCGGTG  
CTTTTTTT

U6 Promoter

Predicted TSS

Spacer

gRNA Scaffold

U6 Terminator

### >hgRNA-C21

GAGGGCCTATTTCCCATGATTCCTTCATATTTGCATATACGATACAAGGCTGTTAGAGAGATAAATTGGA  
ATTAATTTGACTGTAAACACAAAGATATTAGTACAAAATACGTGACGTAGAAAGTAATAATTTCTTGGG  
TAGTTTGCAGTTTTTAAAATTATGTTTTTAAAATGGACTATCATATGCTTACCGTAACTTGAAAGTATTTT  
GATTTCTTGGCTTTATATATCTTGTGGAAAGGACG AAACACC GTACACCCTCAAGCAGTGTG GGGTTA  
GAGCTAGAAATAGCAAGTTAACCTAAGGCTAGTCCGTTATCAACTTGAAAAAGTGGCACCGAGTCGGTG  
CTTTTTTT

U6 Promoter

Predicted TSS

Spacer

gRNA Scaffold

U6 Terminator

### >hgRNA-D21

GAGGGCCTATTTCCCATGATTCCTTCATATTTGCATATACGATACAAGGCTGTTAGAGAGATAAATTGGA  
ATTAATTTGACTGTAAACACAAAGATATTAGTACAAAATACGTGACGTAGAAAGTAATAATTTCTTGGG  
TAGTTTGCAGTTTTTAAAATTATGTTTTTAAAATGGACTATCATATGCTTACCGTAACTTGAAAGTATTTT  
GATTTCTTGGCTTTATATATCTTGTGGAAAGGACG AAACACC GTCACGCTACGGCCAAGGTG GGGTTA  
GAGCTAGAAATAGCAAGTTAACCTAAGGCTAGTCCGTTATCAACTTGAAAAAGTGGCACCGAGTCGGTG  
CTTTTTTT

U6 Promoter

Predicted TSS

Spacer

gRNA Scaffold

U6 Terminator

### >hgRNA-E21

GAGGGCCTATTTCCCATGATTCCTTCATATTTGCATATACGATACAAGGCTGTTAGAGAGATAAATTGGA  
ATTAATTTGACTGTAAACACAAAGATATTAGTACAAAATACGTGACGTAGAAAGTAATAATTTCTTGGG  
TAGTTTGCAGTTTTTAAAATTATGTTTTTAAAATGGACTATCATATGCTTACCGTAACTTGAAAGTATTTT  
GATTTCTTGGCTTTATATATCTTGTGGAAAGGACG AAACACC GTTCCAGAGATACTGACGTG GGGTTA  
GAGCTAGAAATAGCAAGTTAACCTAAGGCTAGTCCGTTATCAACTTGAAAAAGTGGCACCGAGTCGGTG  
CTTTTTTT

U6 Promoter

Predicted TSS

Spacer

gRNA Scaffold

U6 Terminator

### >hgRNA-F21

GAGGGCCTATTTCCCATGATTCCTTCATATTTGCATATACGATACAAGGCTGTTAGAGAGATAAATTGGA  
ATTAATTTGACTGTAAACACAAAGATATTAGTACAAAATACGTGACGTAGAAAGTAATAATTTCTTGGG  
TAGTTTGCAGTTTTAAAATTATGTTTTAAAATGGACTATCATATGCTTACCGTAACTTGAAAGTATTTT  
GATTTCTTGGCTTTATATATCTTGTGGAAAGGACG AACACC GGTGTGTAGCGATGGCTACAG GGGTTA  
GAGCTAGAAATAGCAAGTTAACCTAAGGCTAGTCCGTTATCAACTTGAAAAAGTGGCACCGAGTCGGTG  
CTTTTTTT

U6 Promoter

Predicted TSS

Spacer

gRNA Scaffold

U6 Terminator

### >hgRNA-G21

GAGGGCCTATTTCCCATGATTCCTTCATATTTGCATATACGATACAAGGCTGTTAGAGAGATAAATTGGA  
ATTAATTTGACTGTAAACACAAAGATATTAGTACAAAATACGTGACGTAGAAAGTAATAATTTCTTGGG  
TAGTTTGCAGTTTTAAAATTATGTTTTAAAATGGACTATCATATGCTTACCGTAACTTGAAAGTATTTT  
GATTTCTTGGCTTTATATATCTTGTGGAAAGGACG AACACC GTATGCGGATGCAATCTCCG GGGTTA  
GAGCTAGAAATAGCAAGTTAACCTAAGGCTAGTCCGTTATCAACTTGAAAAAGTGGCACCGAGTCGGTG  
CTTTTTTT

U6 Promoter

Predicted TSS

Spacer

gRNA Scaffold

U6 Terminator

### >hgRNA-A'26

GAGGGCCTATTTCCCATGATTCCTTCATATTTGCATATACGATACAAGGCTGTTAGAGAGATAAATTGGA  
ATTAATTTGACTGTAAACACAAAGATATTAGTACAAAATACGTGACGTAGAAAGTAATAATTTCTTGGG  
TAGTTTGCAGTTTTAAAATTATGTTTTAAAATGGACTATCATATGCTTACCGTAACTTGAAAGTATTTT  
GATTTCTTGGCTTTATATATCTTGTGGAAAGGACG AACACC GTAGACGCACCTCCACCCACAGTG G  
GGTTAGAGCTAGAAATAGCAAGTTAACCTAAGGCTAGTCCGTTATCAACTTGAAAAAGTGGCACCGAGT  
CGGTGCTTTTTTTT

U6 Promoter

Predicted TSS

Spacer

gRNA Scaffold

U6 Terminator

### >hgRNA-A'51

GAGGGCCTATTTCCCATGATTCCTTCATATTTGCATATACGATACAAGGCTGTTAGAGAGATAAATTGGA  
ATTAATTTGACTGTAAACACAAAGATATTAGTACAAAATACGTGACGTAGAAAGTAATAATTTCTTGGG  
TAGTTTGCAGTTTTAAAATTATGTTTTAAAATGGACTATCATATGCTTACCGTAACTTGAAAGTATTTT

GATTTCTTGGCTTTATATATCTTGTGGAAAGGACG AACACC GTAGACGCGGTCACACTGATGCAGCT  
AGTA TGCACCTCCACCCACAGTG GGGTTAGAGCTAGAAAATAGCAAGTTAACCTAAGGCTAGTCCGTTA  
TCAACTTGAAAAAGTGGCACCAGTCGGTGCT TTTTTTT

U6 Promoter Predicted TSS Spacer gRNA Scaffold U6 Terminator

### >hgRNA-A'76

GAGGGCCTATTTCCCATGATTCCTTCATATTTGCATATACGATACAAGGCTGTTAGAGAGATAAATTGGA  
ATTAATTTGACTGTAAACACAAAGATATTAGTACAAAATACGTGACGTAGAAAGTAATAATTTCTTGGG  
TAGTTTGCAGTTTTAAAATTATGTTTTAAAATGGACTATCATATGCTTACCGTAACTTGAAAGTATTTT  
GATTTCTTGGCTTTATATATCTTGTGGAAAGGACG AACACC GTAGACGCTGTGACAGAGCCAACAG  
CAGTCTCGGTCACACTGATGCAGCTAGTA TGCACCTCCACCCACAGTG GGGTTAGAGCTAGAAAATAGC  
AAGTTAACCTAAGGCTAGTCCGTTATCAACTTGAAAAAGTGGCACCAGTCGGTGCT TTTTTTT

U6 Promoter Predicted TSS Spacer gRNA Scaffold U6 Terminator

### >hgRNA-A'101

GAGGGCCTATTTCCCATGATTCCTTCATATTTGCATATACGATACAAGGCTGTTAGAGAGATAAATTGGA  
ATTAATTTGACTGTAAACACAAAGATATTAGTACAAAATACGTGACGTAGAAAGTAATAATTTCTTGGG  
TAGTTTGCAGTTTTAAAATTATGTTTTAAAATGGACTATCATATGCTTACCGTAACTTGAAAGTATTTT  
GATTTCTTGGCTTTATATATCTTGTGGAAAGGACG AACACC GTAGACGGCTAGATGAAGAGCAAGCG  
CATGGACTGTGACAGAGCCAACACGCAGTCTCGGTCACACTGATGCAGCTAGTA TGCACCTCCACCCCA  
CAGTG GGGTTAGAGCTAGAAAATAGCAAGTTAACCTAAGGCTAGTCCGTTATCAACTTGAAAAAGTGGA  
CCGAGTCGGTGCT TTTTTTT

U6 Promoter Predicted TSS Spacer gRNA Scaffold U6 Terminator

### >FISSEQ-hgRNA-Design1

GAGGGCCTATTTCCCATGATTCCTTCATATTTGCATATACGATACAAGGCTGTTAGAGAGATAAATTGGA  
ATTAATTTGACTGTAAACACAAAGATATTAGTACAAAATACGTGACGTAGAAAGTAATAATTTCTTGGG  
TAGTTTGCAGTTTTAAAATTATGTTTTAAAATGGACTATCATATGCTTACCGTAACTTGAAAGTATTTT  
GATTTCTTGGCTTTATATATCTTGTGGAAAGGACG AACACC GTGGAGCAATTCACAACAC GGGTTA  
GAGCTAGAAAATAGCAAGTTAACCTAAGGCTAGTCCGTTATCAACTTGAAAAAGTGGCACCAGTCGGTG  
CCACTGTTGTCTTATACCAACTTCC TTTTTTT

U6 Promoter Predicted TSS Spacer gRNA Scaffold U6 Terminator  
RT Primer Binding Site RCA Primer Binding Site

>FISSEQ-hgRNA-Design2

GAGGGCCTATTTCCCATGATTCCTTCATATTTGCATATACGATACAAGGCTGTTAGAGAGATAAATTGGA  
ATTAATTTGACTGTAAACACAAAGATATTAGTACAAAATACGTGACGTAGAAAGTAATAATTTCTTGGG  
TAGTTTGCAGTTTTAAAATTATGTTTTAAAATGGACTATCATATGCTTACCGTAACTTGAAAGTATTTT  
GATTTCTTGGCTTTATATATCTTGTGGAAAGGACG AACACC **GTGGAGCAATCCACAACAC** GGGTTA  
GAGCTAGAAATAGCAAGTTAACCTAAGGCTAGTCCGTTATCAACTTATTA **CACTGTTGTCTTATACCA**  
**CTTTCC**TAATAAGTGGCACCCGAGTCGGTGC **TTTTTTT**

U6 Promoter

Predicted TSS

Spacer

gRNA Scaffold

U6 Terminator

**RT Primer Binding Site**

**RCA Primer Binding Site**
